# Supplementary material
Source: HighWire-hosted journal article supplement (https://rapm.bmj.com/highwire/filestream/14954/field_highwire_adjunct_files/0/rapm-2021-102561supp001_data_supplement.pdf)
Supplement: rapm-2021-102561supp001_data_supplement.pdf [file rapm-2021-102561supp001_data_supplement.pdf]

## Supplement 1 – I-AIM Checklists for POCUS Skills

| Airway POCUS Education & Training Goals Checklist                                         |                          |                          |                          |                 |
|-------------------------------------------------------------------------------------------|--------------------------|--------------------------|--------------------------|-----------------|
| <b>Indications</b>                                                                        |                          |                          |                          |                 |
| <i>Does the learner understand the following indications?</i>                             | <b>Yes</b>               | <b>No</b>                | <b>Uncertain</b>         | <b>Comments</b> |
| To aid in location of the cricothyroid membrane                                           | <input type="checkbox"/> | <input type="checkbox"/> | <input type="checkbox"/> |                 |
| To aid in location of the cricoid cartilage                                               | <input type="checkbox"/> | <input type="checkbox"/> | <input type="checkbox"/> |                 |
| To aid in location of tracheal rings                                                      | <input type="checkbox"/> | <input type="checkbox"/> | <input type="checkbox"/> |                 |
| To confirm of oro- or nasogastric tube placement                                          | <input type="checkbox"/> | <input type="checkbox"/> | <input type="checkbox"/> |                 |
| To confirm correct endotracheal tube placement                                            | <input type="checkbox"/> | <input type="checkbox"/> | <input type="checkbox"/> |                 |
| <b>Image acquisition</b>                                                                  |                          |                          |                          |                 |
| <i>Has the learner imaged the following structures in sagittal and transverse planes?</i> | <b>Yes</b>               | <b>No</b>                | <b>Uncertain</b>         | <b>Comments</b> |
| Thyroid cartilage                                                                         | <input type="checkbox"/> | <input type="checkbox"/> | <input type="checkbox"/> |                 |
| Vocal Cords                                                                               | <input type="checkbox"/> | <input type="checkbox"/> | <input type="checkbox"/> |                 |
| Cricothyroid membrane                                                                     | <input type="checkbox"/> | <input type="checkbox"/> | <input type="checkbox"/> |                 |
| Cricoid cartilage                                                                         | <input type="checkbox"/> | <input type="checkbox"/> | <input type="checkbox"/> |                 |
| Hyoid                                                                                     | <input type="checkbox"/> | <input type="checkbox"/> | <input type="checkbox"/> |                 |
| Tracheal rings                                                                            | <input type="checkbox"/> | <input type="checkbox"/> | <input type="checkbox"/> |                 |
| Esophagus                                                                                 | <input type="checkbox"/> | <input type="checkbox"/> | <input type="checkbox"/> |                 |
| Thyroid gland                                                                             | <input type="checkbox"/> | <input type="checkbox"/> | <input type="checkbox"/> |                 |
| Surrounding vasculature (carotid artery, jugular veins etc)                               | <input type="checkbox"/> | <input type="checkbox"/> | <input type="checkbox"/> |                 |
| <b>Image interpretation</b>                                                               |                          |                          |                          |                 |
| <i>Can the learner successfully interpret the following imaging?</i>                      | <b>Yes</b>               | <b>No</b>                | <b>Uncertain</b>         | <b>Comments</b> |
| Cricothyroid membrane                                                                     | <input type="checkbox"/> | <input type="checkbox"/> | <input type="checkbox"/> |                 |
| Cricoid cartilage                                                                         | <input type="checkbox"/> | <input type="checkbox"/> | <input type="checkbox"/> |                 |
| Tracheal rings                                                                            | <input type="checkbox"/> | <input type="checkbox"/> | <input type="checkbox"/> |                 |

|                                                                                                                                             |                          |                          |                          |                 |
|---------------------------------------------------------------------------------------------------------------------------------------------|--------------------------|--------------------------|--------------------------|-----------------|
| Confirmation of the esophageal location of oro- or nasogastric tube                                                                         | <input type="checkbox"/> | <input type="checkbox"/> | <input type="checkbox"/> |                 |
| Confirmation of intra-tracheal and excluding esophageal tracheal tube placement                                                             | <input type="checkbox"/> | <input type="checkbox"/> | <input type="checkbox"/> |                 |
| <b>Medical decision-making</b>                                                                                                              |                          |                          |                          |                 |
| <i>Does the learner understand the appropriate medical-decision-making?</i>                                                                 | <b>Yes</b>               | <b>No</b>                | <b>Uncertain</b>         | <b>Comments</b> |
| Image the cricothyroid membrane in longitudinal and transverse planes and mark the skin for the correct location of emergent cricothyrotomy | <input type="checkbox"/> | <input type="checkbox"/> | <input type="checkbox"/> |                 |
| Determine and mark the skin for the correct location of cricoid force (pressure)                                                            | <input type="checkbox"/> | <input type="checkbox"/> | <input type="checkbox"/> |                 |
| Determine the safe utilization of an oro- or nasogastric tube for gastric decompression or feeding                                          | <input type="checkbox"/> | <input type="checkbox"/> | <input type="checkbox"/> |                 |



| <b>Lung Ultrasound Education &amp; Training Goals Checklist</b>                                                    |                          |                          |                          |                 |
|--------------------------------------------------------------------------------------------------------------------|--------------------------|--------------------------|--------------------------|-----------------|
| <b>Indications</b>                                                                                                 |                          |                          |                          |                 |
| <i>Does the learner understand the following indications?</i>                                                      | <b>Yes</b>               | <b>No</b>                | <b>Uncertain</b>         | <b>Comments</b> |
| Pneumothorax                                                                                                       | <input type="checkbox"/> | <input type="checkbox"/> | <input type="checkbox"/> |                 |
| Effusions / Blood                                                                                                  | <input type="checkbox"/> | <input type="checkbox"/> | <input type="checkbox"/> |                 |
| Diaphragmatic paresis                                                                                              | <input type="checkbox"/> | <input type="checkbox"/> | <input type="checkbox"/> |                 |
| Interstitial Syndrome                                                                                              | <input type="checkbox"/> | <input type="checkbox"/> | <input type="checkbox"/> |                 |
| <i>Does the learner understand the following limitations or pitfalls?</i>                                          | <b>Yes</b>               | <b>No</b>                | <b>Uncertain</b>         | <b>Comments</b> |
| Previous thoracic surgery (pneumonectomy, pleurodesis)                                                             | <input type="checkbox"/> | <input type="checkbox"/> | <input type="checkbox"/> |                 |
| Severe pre-existing lung disease (Bullae, pulmonary fibrosis, septations, emphysema), lung contusion/consolidation | <input type="checkbox"/> | <input type="checkbox"/> | <input type="checkbox"/> |                 |
| Small effusions, intraperitoneal fluid, loculated/complex collections                                              | <input type="checkbox"/> | <input type="checkbox"/> | <input type="checkbox"/> |                 |
| Mechanical ventilation, apnea, Ascites, subphrenic fluid accumulation                                              | <input type="checkbox"/> | <input type="checkbox"/> | <input type="checkbox"/> |                 |
| <b>Image acquisition</b>                                                                                           |                          |                          |                          |                 |
| <i>Has the learner imaged the following structures for pneumothorax?</i>                                           | <b>Yes</b>               | <b>No</b>                | <b>Uncertain</b>         | <b>Comments</b> |
| Superior and inferior ribs and their shadows (Batwing sign)                                                        | <input type="checkbox"/> | <input type="checkbox"/> | <input type="checkbox"/> |                 |
| Pleural line                                                                                                       | <input type="checkbox"/> | <input type="checkbox"/> | <input type="checkbox"/> |                 |
| <i>Has the learner imaged the following structures for effusion/blood?</i>                                         | <b>Yes</b>               | <b>No</b>                | <b>Uncertain</b>         | <b>Comments</b> |
| Diaphragm                                                                                                          | <input type="checkbox"/> | <input type="checkbox"/> | <input type="checkbox"/> |                 |
| Anterior chest wall                                                                                                | <input type="checkbox"/> | <input type="checkbox"/> | <input type="checkbox"/> |                 |
| Lung parenchyma                                                                                                    | <input type="checkbox"/> | <input type="checkbox"/> | <input type="checkbox"/> |                 |
| <i>Has the learner imaged the following structures for diaphragmatic movement?</i>                                 | <b>Yes</b>               | <b>No</b>                | <b>Uncertain</b>         | <b>Comments</b> |
| The mid-axillary line at the 8th – 9 <sup>th</sup> Intercostal space                                               | <input type="checkbox"/> | <input type="checkbox"/> | <input type="checkbox"/> |                 |
| Midclavicular/anterior axillary line at the subcostal region                                                       | <input type="checkbox"/> | <input type="checkbox"/> | <input type="checkbox"/> |                 |
| <b>Image interpretation</b>                                                                                        |                          |                          |                          |                 |

| <i>Can the learner successfully interpret the following imaging to rule out a pneumothorax?</i>           | <b>Yes</b>               | <b>No</b>                | <b>Uncertain</b>         | <b>Comments</b> |
|-----------------------------------------------------------------------------------------------------------|--------------------------|--------------------------|--------------------------|-----------------|
| Lung sliding/pulse                                                                                        | <input type="checkbox"/> | <input type="checkbox"/> | <input type="checkbox"/> |                 |
| Vertical artifacts (B-lines, comet tail)                                                                  | <input type="checkbox"/> | <input type="checkbox"/> | <input type="checkbox"/> |                 |
| Seashore sign                                                                                             | <input type="checkbox"/> | <input type="checkbox"/> | <input type="checkbox"/> |                 |
| <i>Can the learner successfully interpret the following imaging to diagnose a pneumothorax?</i>           | <b>Yes</b>               | <b>No</b>                | <b>Uncertain</b>         | <b>Comments</b> |
| Lung point                                                                                                | <input type="checkbox"/> | <input type="checkbox"/> | <input type="checkbox"/> |                 |
| Absence of lung sliding and A-line pattern                                                                | <input type="checkbox"/> | <input type="checkbox"/> | <input type="checkbox"/> |                 |
| Barcode sign                                                                                              | <input type="checkbox"/> | <input type="checkbox"/> | <input type="checkbox"/> |                 |
| <i>Can the learner successfully interpret the following imaging to assess for an effusion/blood?</i>      | <b>Yes</b>               | <b>No</b>                | <b>Uncertain</b>         | <b>Comments</b> |
| Curtain Sign (rule out effusion)                                                                          | <input type="checkbox"/> | <input type="checkbox"/> | <input type="checkbox"/> |                 |
| Anechoic collection cephalad to the diaphragm                                                             | <input type="checkbox"/> | <input type="checkbox"/> | <input type="checkbox"/> |                 |
| Spine sign                                                                                                | <input type="checkbox"/> | <input type="checkbox"/> | <input type="checkbox"/> |                 |
| Sinusoid sign                                                                                             | <input type="checkbox"/> | <input type="checkbox"/> | <input type="checkbox"/> |                 |
| <i>Can the learner successfully interpret the following imaging to assess for diaphragmatic function?</i> | <b>Yes</b>               | <b>No</b>                | <b>Uncertain</b>         | <b>Comments</b> |
| $\Delta$ tdi (Change in diaphragm thickness between end-expiration and end-inspiration) < 20%             | <input type="checkbox"/> | <input type="checkbox"/> | <input type="checkbox"/> |                 |
| Excursion less than 1.8cm during quiet breathing or less than 4.8cm during deep breathing                 | <input type="checkbox"/> | <input type="checkbox"/> | <input type="checkbox"/> |                 |
| Paradoxical movement on inspiration (towards probe)                                                       | <input type="checkbox"/> | <input type="checkbox"/> | <input type="checkbox"/> |                 |
| <b>Medical decision-making</b>                                                                            |                          |                          |                          |                 |
| <i>Does the learner understand the appropriate medical decision-making for pneumothorax?</i>              | <b>Yes</b>               | <b>No</b>                | <b>Uncertain</b>         | <b>Comments</b> |
| Observe vs. needle decompression vs. chest tube vs. pigtail                                               | <input type="checkbox"/> | <input type="checkbox"/> | <input type="checkbox"/> |                 |

| <i>Does the learner understand the appropriate medical decision-making for effusion or blood?</i>         | <b>Yes</b>               | <b>No</b>                | <b>Uncertain</b>         | <b>Comments</b> |
|-----------------------------------------------------------------------------------------------------------|--------------------------|--------------------------|--------------------------|-----------------|
| Observation vs. chest-tube vs. thoracotomy                                                                | <input type="checkbox"/> | <input type="checkbox"/> | <input type="checkbox"/> |                 |
| <i>Does the learner understand the appropriate medical decision-making for diaphragmatic dysfunction?</i> | <b>Yes</b>               | <b>No</b>                | <b>Uncertain</b>         | <b>Comments</b> |
| Supportive measurements                                                                                   | <input type="checkbox"/> | <input type="checkbox"/> | <input type="checkbox"/> |                 |
| NIMV vs. intubation                                                                                       | <input type="checkbox"/> | <input type="checkbox"/> | <input type="checkbox"/> |                 |



| <b>Gastric Ultrasound Education &amp; Training Goals Checklist</b>                                                      |                          |                          |                          |                 |
|-------------------------------------------------------------------------------------------------------------------------|--------------------------|--------------------------|--------------------------|-----------------|
| <b>Indications</b>                                                                                                      |                          |                          |                          |                 |
| <i>Does the learner understand the following indications and limitations?</i>                                           | <b>Yes</b>               | <b>No</b>                | <b>Uncertain</b>         | <b>Comments</b> |
| Unclear history and/or unknown fasting status                                                                           | <input type="checkbox"/> | <input type="checkbox"/> | <input type="checkbox"/> |                 |
| Urgent surgery                                                                                                          | <input type="checkbox"/> | <input type="checkbox"/> | <input type="checkbox"/> |                 |
| Risk factors for delayed gastric emptying                                                                               | <input type="checkbox"/> | <input type="checkbox"/> | <input type="checkbox"/> |                 |
| Limitation: Previous gastric surgery                                                                                    | <input type="checkbox"/> | <input type="checkbox"/> | <input type="checkbox"/> |                 |
| Limitation: Large hiatal hernia                                                                                         | <input type="checkbox"/> | <input type="checkbox"/> | <input type="checkbox"/> |                 |
| <b>Image acquisition</b>                                                                                                |                          |                          |                          |                 |
| <i>Has the learner imaged the following structures in the supine and right lateral decubitus position?</i>              | <b>Yes</b>               | <b>No</b>                | <b>Uncertain</b>         | <b>Comments</b> |
| Liver                                                                                                                   | <input type="checkbox"/> | <input type="checkbox"/> | <input type="checkbox"/> |                 |
| Gastric Antrum                                                                                                          | <input type="checkbox"/> | <input type="checkbox"/> | <input type="checkbox"/> |                 |
| Pancreas                                                                                                                | <input type="checkbox"/> | <input type="checkbox"/> | <input type="checkbox"/> |                 |
| Abdominal Aorta                                                                                                         | <input type="checkbox"/> | <input type="checkbox"/> | <input type="checkbox"/> |                 |
| Thoracic Spine                                                                                                          | <input type="checkbox"/> | <input type="checkbox"/> | <input type="checkbox"/> |                 |
| <b>Image interpretation</b>                                                                                             |                          |                          |                          |                 |
| <i>Can the learner successfully interpret the following qualitative findings?</i>                                       | <b>Yes</b>               | <b>No</b>                | <b>Uncertain</b>         | <b>Comments</b> |
| Empty (no content)                                                                                                      | <input type="checkbox"/> | <input type="checkbox"/> | <input type="checkbox"/> |                 |
| Clear Fluid                                                                                                             | <input type="checkbox"/> | <input type="checkbox"/> | <input type="checkbox"/> |                 |
| Solid (early)                                                                                                           | <input type="checkbox"/> | <input type="checkbox"/> | <input type="checkbox"/> |                 |
| Solid (late)                                                                                                            | <input type="checkbox"/> | <input type="checkbox"/> | <input type="checkbox"/> |                 |
| Thick fluid                                                                                                             | <input type="checkbox"/> | <input type="checkbox"/> | <input type="checkbox"/> |                 |
| <i>Can the learner successfully interpret the following quantitative findings?</i>                                      | <b>Yes</b>               | <b>No</b>                | <b>Uncertain</b>         | <b>Comments</b> |
| Estimate volume based on a cross sectional area (CSA) of the antrum in the RLD                                          | <input type="checkbox"/> | <input type="checkbox"/> | <input type="checkbox"/> |                 |
| <b>Medical decision-making</b>                                                                                          |                          |                          |                          |                 |
| <i>Does the learner understand the appropriate medical decision-making for gastric ultrasound with an empty stomach</i> | <b>Yes</b>               | <b>No</b>                | <b>Uncertain</b>         | <b>Comments</b> |

|                                                                                                                                                            |                          |                          |                          |                 |
|------------------------------------------------------------------------------------------------------------------------------------------------------------|--------------------------|--------------------------|--------------------------|-----------------|
| <i>(no content or low fluid volume (&lt;1.5 mL/Kg)?</i>                                                                                                    |                          |                          |                          |                 |
| Proceed with the case with no special aspiration precautions indicated                                                                                     | <input type="checkbox"/> | <input type="checkbox"/> | <input type="checkbox"/> |                 |
| <i>Does the learner understand the appropriate medical decision-making for gastric ultrasound with solid content or high fluid volume (&gt;1.5 mL/Kg)?</i> | <b>Yes</b>               | <b>No</b>                | <b>Uncertain</b>         | <b>Comments</b> |
| Consider postponing if elective with recent intake                                                                                                         | <input type="checkbox"/> | <input type="checkbox"/> | <input type="checkbox"/> |                 |
| If need to proceed, then use aspiration prophylaxis (e.g. awake patient or tracheal intubation, rapid sequence induction)                                  | <input type="checkbox"/> | <input type="checkbox"/> | <input type="checkbox"/> |                 |
| <i>Does the learner understand the appropriate medical decision-making for gastric ultrasound with unclear/equivocal imaging?</i>                          | <b>Yes</b>               | <b>No</b>                | <b>Uncertain</b>         | <b>Comments</b> |
| Manage based on available clinical information and local policies regarding fasting guidelines                                                             | <input type="checkbox"/> | <input type="checkbox"/> | <input type="checkbox"/> |                 |



| <b>Focused Cardiac Ultrasound Education &amp; Training Goals Checklist</b>                              |                          |                          |                          |                 |
|---------------------------------------------------------------------------------------------------------|--------------------------|--------------------------|--------------------------|-----------------|
| <b>Indications</b>                                                                                      |                          |                          |                          |                 |
| <i>Does the learner understand the following indications and limitations?</i>                           | <b>Yes</b>               | <b>No</b>                | <b>Uncertain</b>         | <b>Comments</b> |
| Hemodynamic instability or undifferentiated shock                                                       | <input type="checkbox"/> | <input type="checkbox"/> | <input type="checkbox"/> |                 |
| Cardiac arrest                                                                                          | <input type="checkbox"/> | <input type="checkbox"/> | <input type="checkbox"/> |                 |
| Pericardial effusion/tamponade: signs and symptoms                                                      | <input type="checkbox"/> | <input type="checkbox"/> | <input type="checkbox"/> |                 |
| Heart failure: signs and symptoms                                                                       | <input type="checkbox"/> | <input type="checkbox"/> | <input type="checkbox"/> |                 |
| High cardiac risk patients                                                                              | <input type="checkbox"/> | <input type="checkbox"/> | <input type="checkbox"/> |                 |
| Adjunct to physical examination                                                                         | <input type="checkbox"/> | <input type="checkbox"/> | <input type="checkbox"/> |                 |
| <b>Image acquisition</b>                                                                                |                          |                          |                          |                 |
| <i>Has the learner imaged the following structures?</i>                                                 | <b>Yes</b>               | <b>No</b>                | <b>Uncertain</b>         | <b>Comments</b> |
| Parasternal Long Axis (PLAX)                                                                            | <input type="checkbox"/> | <input type="checkbox"/> | <input type="checkbox"/> |                 |
| Parasternal Short Axis (PSAX)                                                                           | <input type="checkbox"/> | <input type="checkbox"/> | <input type="checkbox"/> |                 |
| Apical 4-Chamber View (A4CH)                                                                            | <input type="checkbox"/> | <input type="checkbox"/> | <input type="checkbox"/> |                 |
| Subcostal 4 Chamber (SC4CH)                                                                             | <input type="checkbox"/> | <input type="checkbox"/> | <input type="checkbox"/> |                 |
| Subcostal Inferior Vena Cava (SCIVC)                                                                    | <input type="checkbox"/> | <input type="checkbox"/> | <input type="checkbox"/> |                 |
| <b>Image interpretation</b>                                                                             |                          |                          |                          |                 |
| <i>Can the learner successfully interpret the following qualitative findings?</i>                       | <b>Yes</b>               | <b>No</b>                | <b>Uncertain</b>         | <b>Comments</b> |
| Ventricular dimensions and systolic function                                                            | <input type="checkbox"/> | <input type="checkbox"/> | <input type="checkbox"/> |                 |
| Volume status/responsiveness                                                                            | <input type="checkbox"/> | <input type="checkbox"/> | <input type="checkbox"/> |                 |
| Pericardial effusion/tamponade                                                                          | <input type="checkbox"/> | <input type="checkbox"/> | <input type="checkbox"/> |                 |
| Gross anatomical abnormalities                                                                          | <input type="checkbox"/> | <input type="checkbox"/> | <input type="checkbox"/> |                 |
| Gross signs of chronic heart disease                                                                    | <input type="checkbox"/> | <input type="checkbox"/> | <input type="checkbox"/> |                 |
| <b>Medical decision-making</b>                                                                          |                          |                          |                          |                 |
| <i>Does the learner understand the appropriate medical decision-making for the following pathology?</i> | <b>Yes</b>               | <b>No</b>                | <b>Uncertain</b>         | <b>Comments</b> |
| Local anesthetic systemic toxicity (LAST)                                                               | <input type="checkbox"/> | <input type="checkbox"/> | <input type="checkbox"/> |                 |
| Aortic stenosis (AS)                                                                                    | <input type="checkbox"/> | <input type="checkbox"/> | <input type="checkbox"/> |                 |
| Hypovolemia                                                                                             | <input type="checkbox"/> | <input type="checkbox"/> | <input type="checkbox"/> |                 |

|                                |                          |                          |                          |  |
|--------------------------------|--------------------------|--------------------------|--------------------------|--|
| Massive pulmonary embolism     | <input type="checkbox"/> | <input type="checkbox"/> | <input type="checkbox"/> |  |
| Pericardial effusion/tamponade | <input type="checkbox"/> | <input type="checkbox"/> | <input type="checkbox"/> |  |
| Gross ventricular failure      | <input type="checkbox"/> | <input type="checkbox"/> | <input type="checkbox"/> |  |
